# Supplementary material
Source: publisher site journal article supplement (doi:10.18632/aging.206016)
Supplement: Supplementary file 1 [file aging-v16-206016-supplementary-material-SD3.docx]

**Supplementary File 1. Overexpression plasmid for PI3KCD.**

Accession number/Gene ID of PI3KCD

>NM_005026.5:210-3344 Homo sapiens phosphatidylinositol-4,5-bisphosphate 3-kinase catalytic subunit delta (PIK3CD), transcript variant 1, mRNA

ATGCCCCCTGGGGTGGACTGCCCCATGGAATTCTGGACCAAGGAGGAGAATCAGAGCGTTGTGGTTGACT
TCCTGCTGCCCACAGGGGTCTACCTGAACTTCCCTGTGTCCCGCAATGCCAACCTCAGCACCATCAAGCA
GCTGCTGTGGCACCGCGCCCAGTATGAGCCGCTCTTCCACATGCTCAGTGGCCCCGAGGCCTATGTGTTC
ACCTGCATCAACCAGACAGCGGAGCAGCAAGAGCTGGAGGACGAGCAACGGCGTCTGTGTGACGTGCAGC
CCTTCCTGCCCGTCCTGCGCCTGGTGGCCCGTGAGGGCGACCGCGTGAAGAAGCTCATCAACTCACAGAT
CAGCCTCCTCATCGGCAAAGGCCTCCACGAGTTTGACTCCTTGTGCGACCCAGAAGTGAACGACTTTCGC
GCCAAGATGTGCCAATTCTGCGAGGAGGCGGCCGCCCGCCGGCAGCAGCTGGGCTGGGAGGCCTGGCTGC
AGTACAGTTTCCCCCTGCAGCTGGAGCCCTCGGCTCAAACCTGGGGGCCTGGTACCCTGCGGCTCCCGAA
CCGGGCCCTTCTGGTCAACGTTAAGTTTGAGGGCAGCGAGGAGAGCTTCACCTTCCAGGTGTCCACCAAG
GACGTGCCGCTGGCGCTGATGGCCTGTGCCCTGCGGAAGAAGGCCACAGTGTTCCGGCAGCCGCTGGTGG
AGCAGCCGGAAGACTACACGCTGCAGGTGAACGGCAGGCATGAGTACCTGTATGGCAGCTACCCGCTCTG
CCAGTTCCAGTACATCTGCAGCTGCCTGCACAGTGGGTTGACCCCTCACCTGACCATGGTCCATTCCTCC
TCCATCCTCGCCATGCGGGATGAGCAGAGCAACCCTGCCCCCCAGGTCCAGAAACCGCGTGCCAAACCAC
CTCCCATTCCTGCGAAGAAGCCTTCCTCTGTGTCCCTGTGGTCCCTGGAGCAGCCGTTCCGCATCGAGCT
CATCCAGGGCAGCAAAGTGAACGCCGACGAGCGGATGAAGCTGGTGGTGCAGGCCGGGCTTTTCCACGGC
AACGAGATGCTGTGCAAGACGGTGTCCAGCTCGGAGGTGAGCGTGTGCTCGGAGCCCGTGTGGAAGCAGC
GGCTGGAGTTCGACATCAACATCTGCGACCTGCCCCGCATGGCCCGTCTCTGCTTTGCGCTGTACGCCGT
GATCGAGAAAGCCAAGAAGGCTCGCTCCACCAAGAAGAAGTCCAAGAAGGCGGACTGCCCCATTGCCTGG
GCCAACCTCATGCTGTTTGACTACAAGGACCAGCTTAAGACCGGGGAACGCTGCCTCTACATGTGGCCCT
CCGTCCCAGATGAGAAGGGCGAGCTGCTGAACCCCACGGGCACTGTGCGCAGTAACCCCAACACGGATAG
CGCCGCTGCCCTGCTCATCTGCCTGCCCGAGGTGGCCCCGCACCCCGTGTACTACCCCGCCCTGGAGAAG
ATCTTGGAGCTGGGGCGACACAGCGAGTGTGTGCATGTCACCGAGGAGGAGCAGCTGCAGCTGCGGGAAA
TCCTGGAGCGGCGGGGGTCTGGGGAGCTGTATGAGCACGAGAAGGACCTGGTGTGGAAGCTGCGGCATGA
AGTCCAGGAGCACTTCCCGGAGGCGCTAGCCCGGCTGCTGCTGGTCACCAAGTGGAACAAGCATGAGGAT
GTGGCCCAGATGCTCTACCTGCTGTGCTCCTGGCCGGAGCTGCCCGTCCTGAGCGCCCTGGAGCTGCTAG
ACTTCAGCTTCCCCGATTGCCACGTAGGCTCCTTCGCCATCAAGTCGCTGCGGAAACTGACGGACGATGA
GCTGTTCCAGTACCTGCTGCAGCTGGTGCAGGTGCTCAAGTACGAGTCCTACCTGGACTGCGAGCTGACC
AAATTCCTGCTGGACCGGGCCCTGGCCAACCGCAAGATCGGCCACTTCCTTTTCTGGCACCTCCGCTCCG
AGATGCACGTGCCGTCGGTGGCCCTGCGCTTCGGCCTCATCCTGGAGGCCTACTGCAGGGGCAGCACCCA
CCACATGAAGGTGCTGATGAAGCAGGGGGAAGCACTGAGCAAACTGAAGGCCCTGAATGACTTCGTCAAG
CTGAGCTCTCAGAAGACCCCCAAGCCCCAGACCAAGGAGCTGATGCACTTGTGCATGCGGCAGGAGGCCT
ACCTAGAGGCCCTCTCCCACCTGCAGTCCCCACTCGACCCCAGCACCCTGCTGGCTGAAGTCTGCGTGGA
GCAGTGCACCTTCATGGACTCCAAGATGAAGCCCCTGTGGATCATGTACAGCAACGAGGAGGCAGGCAGC
GGCGGCAGCGTGGGCATCATCTTTAAGAACGGGGATGACCTCCGGCAGGACATGCTGACCCTGCAGATGA
TCCAGCTCATGGACGTCCTGTGGAAGCAGGAGGGGCTGGACCTGAGGATGACCCCCTATGGCTGCCTCCC
CACCGGGGACCGCACAGGCCTCATTGAGGTGGTACTCCGTTCAGACACCATCGCCAACATCCAACTCAAC
AAGAGCAACATGGCAGCCACAGCCGCCTTCAACAAGGATGCCCTGCTCAACTGGCTGAAGTCCAAGAACC
CGGGGGAGGCCCTGGATCGAGCCATTGAGGAGTTCACCCTCTCCTGTGCTGGCTATTGTGTGGCCACATA
TGTGCTGGGCATTGGCGATCGGCACAGCGACAACATCATGATCCGAGAGAGTGGGCAGCTGTTCCACATT
GATTTTGGCCACTTTCTGGGGAATTTCAAGACCAAGTTTGGAATCAACCGCGAGCGTGTCCCATTCATCC
TCACCTACGACTTTGTCCATGTGATTCAGCAGGGGAAGACTAATAATAGTGAGAAATTTGAACGGTTCCG
GGGCTACTGTGAAAGGGCCTACACCATCCTGCGGCGCCACGGGCTTCTCTTCCTCCACCTCTTTGCCCTG
ATGCGGGCGGCAGGCCTGCCTGAGCTCAGCTGCTCCAAAGACATCCAGTATCTCAAGGACTCCCTGGCAC
TGGGGAAAACAGAGGAGGAGGCACTGAAGCACTTCCGAGTGAAGTTTAACGAAGCCCTCCGTGAGAGCTG
GAAAACCAAAGTGAACTGGCTGGCCCACAACGTGTCCAAAGACAACAGGCAGTAG
