# Supplementary material
Source: publisher site journal article supplement (doi:10.18632/aging.206016)

SUPPLEMENTARY FIGURE

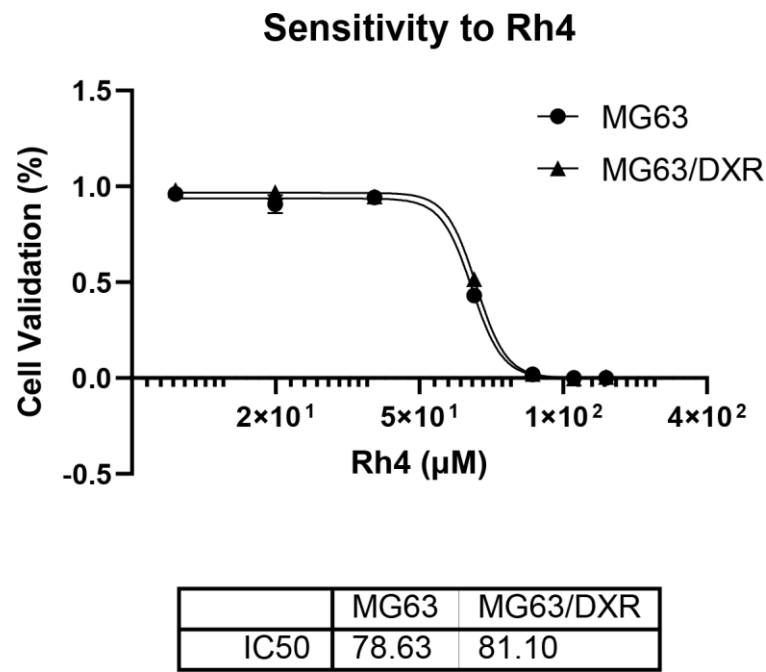

Supplementary Figure 1. Sensitivity of Rh4 in MG63 and MG63/DXR cell lines.

Supplement: Supplementary file 1 [file aging-v16-206016-supplementary-material-SD1.pdf]
